# Supplementary material
Source: Springer Nature journal article supplement (https://www.springermedizin.de/resource/supplementary/12885_2013_4326_MOESM3_ESM.pdf/9468226)

A: Vehicle

B: Everolimus

Ki67

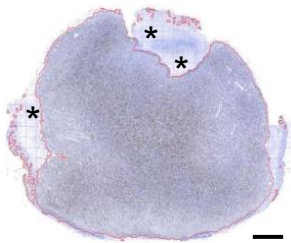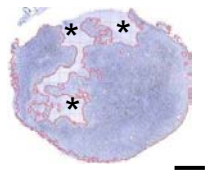

Ki67

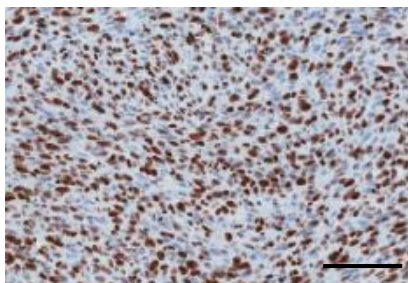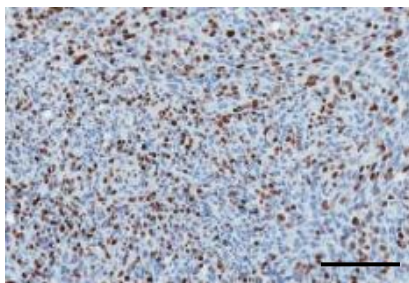

CASP3

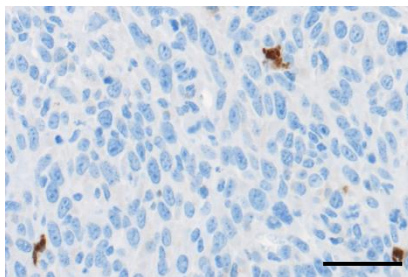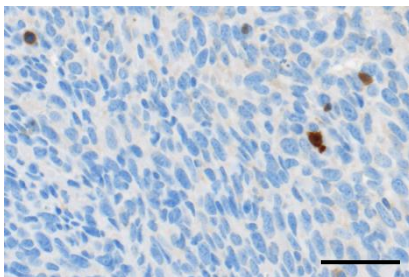

CD31

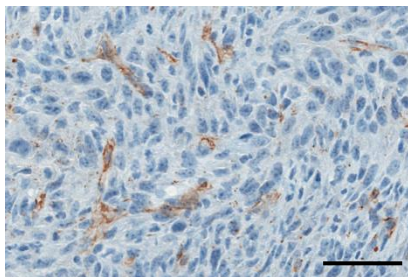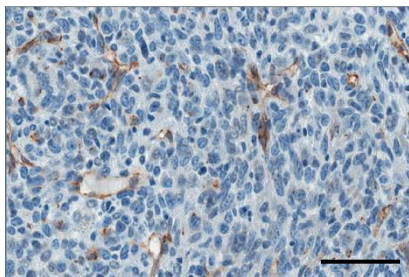

Supplement: MOESM3 [file 9468226]
